# Supplementary material
Source: PubMed Central journal article supplement (PMC5181646)
Supplement: NIHMS819535-supplement-supplement_1.pdf [file NIHMS819535-supplement-supplement_1.pdf]

Online Supplement for:

### **Tau Pathology Influences Dementia Onset and Survival in Lewy Body Spectrum Disorders**

David J. Irwin, MD MS<sup>1,2</sup>, Murray Grossman MD<sup>1,2</sup>, Daniel Weintraub MD<sup>1,2,4</sup>, Howard H. Hurtig MD<sup>1,2</sup>, John E. Duda MD<sup>2,4</sup>, Sharon X. Xie PhD,<sup>3</sup> Edward B. Lee MD PhD<sup>1</sup>, Vivianna Van Deerlin MD, PhD<sup>1</sup>, Oscar L. Lopez MD<sup>5</sup>, Julia K. Kofler MD<sup>6</sup>, Peter T. Nelson, MD PhD<sup>7,8</sup>, Gregory A. Jicha MD PhD<sup>7</sup>, Randy Woltjer MD PhD<sup>9</sup>, Joseph F. Quinn MD<sup>10</sup>, Jeffery Kaye MD<sup>10</sup>, James B Leverenz MD<sup>13</sup>, Debby Tsuang MD, MSc<sup>14,15</sup>, Katelan Longfellow MD<sup>11,16</sup>, Dora Yearout BS<sup>11,15</sup>, Walter Kukull PhD<sup>11</sup>, C. Dirk Keene MD, PhD<sup>12</sup>, Thomas J. Montine MD, PhD<sup>11,12</sup>, Cyrus P. Zabetian MD MS<sup>11,15,16</sup>, John Q. Trojanowski MD PhD<sup>1</sup>.

1 Center for Neurodegenerative Disease Research, Department of Pathology and Laboratory Medicine, Morris K. Udall Parkinson's Disease Center Of Excellence, Institute on Aging, 2 Department of Neurology, 3 Department of Biostatistics and Epidemiology, University of Pennsylvania Perelman School of Medicine, Philadelphia, PA 19104-6021, USA

4 Parkinson's Disease Research, Education and Clinical Center, Michael J. Crescenz VA Medical Center, Philadelphia, PA 19104, USA.

5 Department of Neurology, University of Pittsburgh, Pittsburgh, PA, USA.

6 Department of Pathology, University of Pittsburgh School of Medicine, Pittsburgh, Pennsylvania, United States of America.

7 Sanders-Brown Center on Aging, 8 Department of Pathology University of Kentucky, Lexington, KY, 40536, USA.

9 Department of Pathology, Oregon Health and Science University, Portland, OR, 97239, USA.

10 Department of Neurology, Oregon Health and Science University, Portland, OR, 97239, USA

11 Departments of Neurology and 12 Pathology, and the Pacific Northwest Udall Center, University of Washington School of Medicine, Seattle, WA 98195, USA

13 Cleveland Clinic Lou Ruvo Center for Brain Health, Cleveland Clinic Foundation, Cleveland, OH 44195, USA.

14 Department of Psychiatry and Behavioral Sciences University of Washington School of Medicine, Seattle, WA 98195, USA 15 Geriatric Research, Education, and Clinical Center, and 16 Northwest Parkinson's Disease Research, Education and Clinical Center, VA Puget Sound Health Care System, Seattle, WA 98108.

Supplemental Content: Methods1, Figures 1, Tables 6

Please send correspondence to:

David J. Irwin, MD

Frontotemporal Degeneration Center/ Center for Neurodegenerative Disease Research

University of Pennsylvania Perelman School of Medicine

Hospital of the University of Pennsylvania

3600 Spruce Street, Philadelphia, PA 19104

(215)-662-3361

[dirwin@mail.med.upenn.edu](mailto:dirwin@mail.med.upenn.edu)

## Supplemental Methods:

### *Patients*

Patients were recruited from clinical cores associated with the Udall Center for Excellence in Parkinson's Disease Research at the University of Pennsylvania (Penn) (Penn Parkinson's Disease & Movement Disorders Center, Philadelphia VA Medical Center, Alzheimer's Disease Core Center or Frontotemporal Degeneration Center) or the Pacific Northwest Udall Center (University of Washington, UW) and Oregon Health & Science University) or clinical cores associated with the Alzheimer's Disease Research Centers (ADRCs) at the University of Pittsburgh or Sanders-Brown Center on Aging at the University of Kentucky. All patients met either formal clinical criteria for probable DLB<sup>1</sup> or PDD<sup>2</sup>, as described<sup>3</sup> with autopsy confirmation of brainstem, transitional or neocortical stage LBSD synucleinopathy<sup>1, 4</sup> with varying degrees of co-morbid AD neuropathologic change. The majority of patients had detailed ante mortem clinical characterizations for the onset of Parkinsonism (i.e. bradykinesia with tremor and/or rigidity) and dementia, including assessment of formal clinical diagnostic criteria by the treating physician, as previously described<sup>3</sup> and were obtained from clinical databases at each center. The MDI was calculated by subtracting the age at dementia onset from the age at onset of motor parkinsonism. Thus, some DLB patients have negative values for this variable if dementia preceded motor symptoms. Overall survival was calculated by subtracting the age at the onset of the presenting syndrome of disease (i.e. disease onset characterized by motor parkinsonism and/or dementia) from the age at death. In a subset of cases (n=66) these data were extracted from the clinical records by an experienced clinician (DJI, KL). A subset of neuropathologic and genetic data presented here were previously reported on a subset of patients in a different analysis of PDD<sup>3</sup> and/or the frequency of genetic variants in LBSD compared with controls (n=103)<sup>5, 6</sup>. All procedures were performed in accordance with local IRB guidelines and approvals at each center. *Neuropathological Data*

As part of the neuropathologic assessment at each center, slides were immunostained with well-characterized antibodies or histochemically stained using accepted methods<sup>4</sup> to detect NFTs, neuritic plaques (NPs) and SYN pathology and graded on an ordinal scale (0=none/rare, 1=mild, 2=moderate, 3=severe).<sup>4</sup> NFTs and SYN pathology were detected using immunohistochemistry (IHC) for phosphorylated tau, and alpha-synuclein, respectively, at each center. NPs were detected using accepted protocols<sup>4</sup> including IHC for phosphorylated tau (UW=38, UK=14) or histochemical staining using Thioflavin-S (PENN=133), Bielschowsky silver stain (PITT=15), or a combination of IHC and silverstain (OHSU=13). We examined the following regions: ventromedial temporal lobe (average of amygdala, hippocampus entorhinal cortex, hippocampal cornu ammonis), superior-mid temporal cortex, mid-frontal cortex, anterior cingulate gyrus, and angular gyrus. The cerebral score for each pathologic change was calculated as the average of these five regions, as previously described<sup>3</sup>. Braak and CERAD scores were assigned according to criteria<sup>4</sup>. Since occipital cortex was not routinely sampled we used the density of tau pathology in the hippocampal sub-fields and neocortex to determine Braak V-VI. We modified AA/NIA Neuropathologic Criteria for AD<sup>4</sup> neuropathology to classify patients into four groups: 1) No AD neuropathology (i.e. "pure SYN"), 2) "low-level" AD, 3) "intermediate-level" AD and 4) "high-level" AD. We also dichotomized the burden of AD neuropathologic change into SYN+AD (intermediate/high AD) and SYN-AD (no/low AD) groups. Briefly, Braak NFT stage and CERAD NP scores in the following combinations defined these groups: Pure SYN= B0/C0, B1/C0; Low AD= B1/C1-C3, B2/C0-1; Intermediate AD= B2/C2-3, B3/C1; High AD= B3/C2-3.

We assessed for the presence or absence of cerebrovascular disease (CVD) through examination of gross brain for infarcts or the presence of  $\geq 2$  microinfarcts on examination of hematoxylin and eosin stained slides in 5 standardly sampled regions according to established criteria<sup>4</sup>. We also examined these cases for the presence or absence of hippocampal TDP-43 pathology<sup>7</sup>, argyrophilic grain disease (AGD)<sup>8</sup> and hippocampal sclerosis (HpScI)<sup>9</sup>. Finally, ordinal scores were separately obtained for SYN dystrophic LNs in CA2/3 of the hippocampus (SYNDN)<sup>10</sup>, congophilic angiopathy (CAA) in the midfrontal cortex and for basal ganglia (BG) NFT, NP and SYN pathology.

### *Statistical Analyses*

Continuous variables were assessed for normality using graphical techniques. Normally distributed variables are represented by mean (standard deviation) and analyzed with one-way ANOVA and post-hoc independent t-tests for significant ANOVA results only. Non-normally distributed variables are represented by median (25th, 75th quartile) and analyzed with Kruskal-Wallis and post-hoc Mann-Whitney U analysis for significant results only. Frequency of categorical variables between groups was performed using a chi-square contingency analysis and a post-hoc Mantel-Haenszel test for linear group trend was performed for significant associations only. Genotype frequencies were performed in additive and dominant models with the exception of MAPT haplotype, which was analyzed in a

recessive model, based on the low population frequency of the H2 haplotype. Correlations of cerebral scores with pathological and clinical features was performed using a Spearman correlation. A partial correlation was used to examine the strength of association of individual pathologies with MDI and survival while controlling for co-variables of interest. All analyses were 2-sided ( $\alpha=0.05$ ). We adjusted correlation analyses with  $\alpha=0.003$  to correct for multiple comparisons and reduce the likelihood of false positive discovery and performed using STATA v12.1 (Statacorp College station, TX).

### *Multivariate Regression Modelling*

A multivariate linear regression model-building procedure was used to develop a final model to examine the association of independent continuous neuropathological variables (cerebral NFT score, cerebral NP score, cerebral SYN score) with MDI or survival as the dependent variable to test our hypothesis that AD-related pathology influences a shorter time to dementia and death in LBSD. Due to the linear association between these pathological variables and MDI/survival (Fig.3) and because continuous variables have more information than categorical variables, we chose these continuous measures of pathology and did not examine categorical stages of NFTs, NPs and SYN pathology (i.e. Braak, CERAD and Lewy body stages). We also explored the influence of the presence/absence co-morbid CVD pathology associated with LBSD<sup>11</sup>(CVD). Finally, genetic risk variants associated with LBSD<sup>5-6,12-13</sup> were examined in a dominant model (*APOE*, *SNCA*, *GBA*) or recessive model (*MAPT*) based on previous genetic associations. We did not include variables with missing data for >20% of the cohort (Limbic TDP-43, *GBA* genotype) or rare categorical variables present in <10% of the cohort (HPScl=17, AGD=3 cases). We did not include ordinal scores for region-specific NFT, NP and SYN pathology (i.e. BG NFT, BG NP, BG SYN, CAA, SYN DN) since these are directly-related to the underlying biological processes for the corresponding cerebral scores. Ordinal variable categories were collapsed when <20% frequency of total cases was present in a stratum (*APOE*). We did not use Cox regression to examine factors influencing survival because there is no censoring in the data. Model assumptions of linear regression models were verified. Examination of the distribution of MDI and survival finds these variables are suitable for linear regression.

We used Bayesian Information Criteria (BIC), along with biological rationale to guide model-building procedures. Variables were kept in the model when they improved BIC values  $> 2^{14}$ . Co-linearity between variables was tested using variance inflation factor (VIF) with a conservative cut-off of  $<5$  to exclude unstable models due to co-linearity<sup>15</sup>. Interaction terms were explored based on known associations of *APOE* genotype and NP pathology<sup>16</sup> and between NFT and SYN pathology<sup>3</sup> and tested based on significance of the Wald statistic ( $p<0.05$ ) and improvement on BIC value  $>2$ . Final models were derived through comparison of BIC between models co-varying for age at death and gender: We performed a bootstrapped random patient selection for each final model with 1,000 bootstrap samples to reduce overfitting. This bootstrap procedure serves as an internal validation in the absence of an external validation sample. We report mean beta estimates and 95% CI for each variable from the bootstrapping procedure and adjusted  $R^2$  values.

## **References**

1. McKeith IG, Dickson DW, Lowe J, et al. Diagnosis and management of dementia with Lewy bodies: third report of the DLB Consortium. *Neurology*. 2005 Dec 27;65(12):1863-72.
2. Hughes AJ, Daniel SE, Kilford L, Lees AJ. Accuracy of clinical diagnosis of idiopathic Parkinson's disease: a clinico-pathological study of 100 cases. *Journal of neurology, neurosurgery, and psychiatry*. 1992 Mar;55(3):181-4.
3. Irwin DJ, White MT, Toledo JB, et al. Neuropathologic substrates of Parkinson disease dementia. *Annals of neurology*. 2012 Oct;72(4):587-98.
4. Montine TJ, Phelps CH, Beach TG, et al. National Institute on Aging-Alzheimer's Association guidelines for the neuropathologic assessment of Alzheimer's disease: a practical approach. *Acta neuropathologica*. 2012 Jan;123(1):1-11.
5. Tsuang D, Leverenz JB, Lopez OL, et al. APOE epsilon4 increases risk for dementia in pure synucleinopathies. *JAMA neurology*. 2013 Feb;70(2):223-8.

6. Tsuang D, Leverenz JB, Lopez OL, et al. GBA mutations increase risk for Lewy body disease with and without Alzheimer disease pathology. *Neurology*. 2012 Nov 6;79(19):1944-50.
7. Neumann M, Sampathu DM, Kwong LK, et al. Ubiquitinated TDP-43 in frontotemporal lobar degeneration and amyotrophic lateral sclerosis. *Science*. 2006 Oct 6;314(5796):130-3.
8. Ferrer I, Santpere G, van Leeuwen FW. Argyrophilic grain disease. *Brain : a journal of neurology*. 2008 Jun;131(Pt 6):1416-32.
9. Nelson PT, Schmitt FA, Lin Y, et al. Hippocampal sclerosis in advanced age: clinical and pathological features. *Brain : a journal of neurology*. 2011 May;134(Pt 5):1506-18.
10. Dickson DW, Schmidt ML, Lee VM, Zhao ML, Yen SH, Trojanowski JQ. Immunoreactivity profile of hippocampal CA2/3 neurites in diffuse Lewy body disease. *Acta neuropathologica*. 1994;87(3):269-76.
11. Jellinger KA. Prevalence and impact of cerebrovascular lesions in Alzheimer and lewy body diseases. *Neurodegener Dis*. 2010;7(1-3):112-5.
12. Wider C, Ross OA, Nishioka K, et al. An evaluation of the impact of MAPT, SNCA and APOE on the burden of Alzheimer's and Lewy body pathology. *J Neurol Neurosurg Psychiatry*. 2012 Apr;83(4):424-9.
13. Colom-Cadena M, Gelpi E, Marti MJ, et al. MAPT H1 haplotype is associated with enhanced  $\alpha$ -synuclein deposition in dementia with Lewy bodies. *Neurobiol Aging*. 2013 Mar;34(3):936-42.
14. Raftery AE. Bayesian Model Selection in Social Research. *Sociological Methodology* 1995; 25: 111-63.
15. Belsley, D. A., E. Kuh, and R. E. Welsch. 1980. *Regression Diagnostics: Identifying Influential Data and Sources of Collinearity*. New York: Wiley.
16. Schmechel DE, Saunders AM, Strittmatter WJ, et al. Increased amyloid beta-peptide deposition in cerebral cortex as a consequence of apolipoprotein E genotype in late-onset Alzheimer disease. *Proc Natl Acad Sci U S A*. 1993 Oct 15; 90(20): 9649-9653

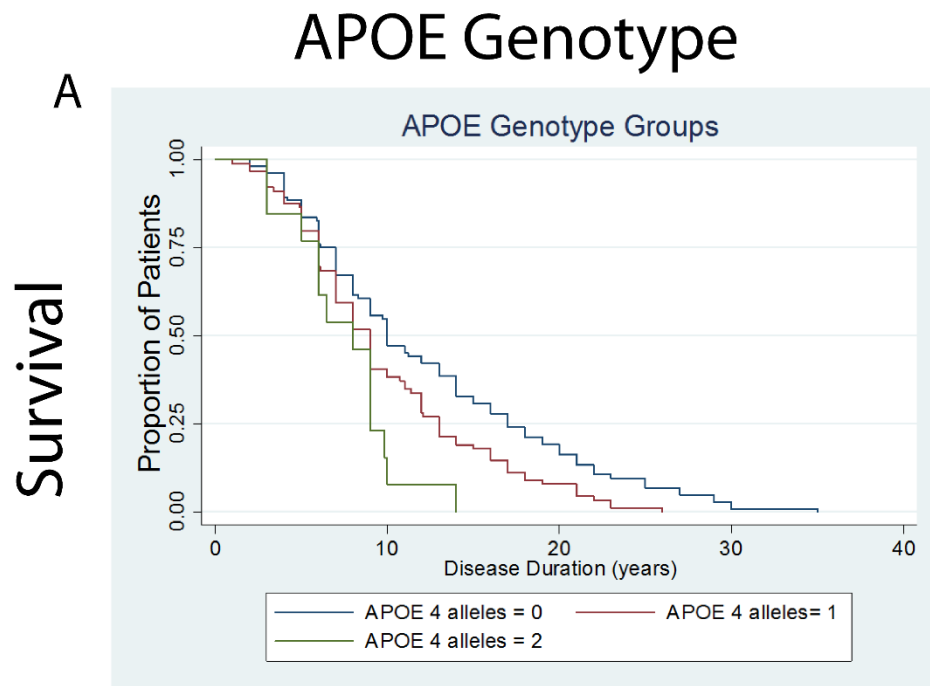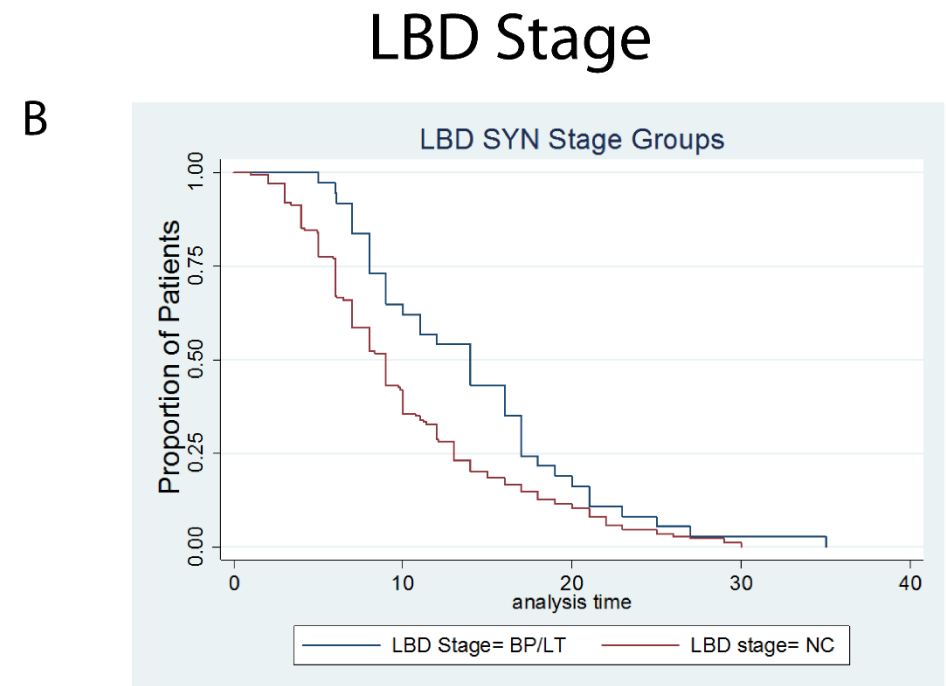

**Supplemental Figure 1. Comparison of disease duration across APOE genotype and LBD pathology stages.** Kaplan-Meier curves depict the proportion of patients surviving at given time points across observed disease duration. There is an incremental dose-effect of burden of APOE 4 genotype (A) and increasing LBD pathological stage (B) for a shorter overall disease duration. Patients with  $\geq 1$  copies of APOE  $\epsilon 4$  had shorter survival compared to those with 0 copies ( $p < 0.01$ ). Patients with NC LBD SYN stage had a shorter survival compared to those with BP/LT ( $p < 0.01$ ). BP=brainstem predominant LBD stage, LT= limbic/transitional LBD stage, NC=neocortical LBD stage.

**Supplementary Table 1. Neuropathological Group Data- Dichotomous Classification of AD.** Chart depicts neuropathological, genetic and clinical data of group-wise comparisons SYN+AD and SYN-AD subgroups.

|                                     | <b>LBD with INT/HIGH AD<br/>(SYN+AD)<br/>N=108</b>               | <b>LBD with NO/LOW AD<br/>(SYN-AD)<br/>N=105</b>                                           | <b>P Value</b>   |
|-------------------------------------|------------------------------------------------------------------|--------------------------------------------------------------------------------------------|------------------|
| <b>Clinical Phenotype</b>           | <b>PDD=39 (36.1%)<br/>DLB=69 (63.9%)</b>                         | <b>PDD=76 (72.4%)<br/>DLB=29 (27.6%)</b>                                                   | <b>&lt;0.001</b> |
| %Male                               | 65.7%                                                            | 77.1%                                                                                      | 0.06             |
| <b>Brain weight (g)</b>             | 1279.6 (156.0)<br>N=85                                           | 1309.4 (152.7)<br>N=94                                                                     | 0.2              |
| <b>Post-mortem Interval (hours)</b> | 10 (5,16.25)                                                     | 8 (5,15)                                                                                   | 0.6              |
| <b>Braak/CERAD</b>                  | <b>B2/C2=17<br/>B2/C3=25<br/>B3C1=3<br/>B3C2=16<br/>B3/C3=47</b> | <b>B0/C0=8<br/>B1/C0=41<br/>B1/C1=7<br/>B1/C2=16<br/>B1/C3=17<br/>B2/C0=11<br/>B2/C1=5</b> | -                |
| <b>Lewy body Stage</b>              | <b>Brainstem=0<br/>Limbic=11<br/>Neocortical=97</b>              | <b>Brainstem=4<br/>Limbic=23<br/>Neocortical=78</b>                                        | <b>0.006</b>     |
| <b>VMTL NFT Score</b>               | <b>2.7 (2,3)<br/>N=105</b>                                       | <b>1.5 (1,2)<br/>N=103</b>                                                                 | <b>&lt;0.001</b> |
| <b>ACG NFT Score</b>                | <b>1 (1,2)<br/>N=103</b>                                         | <b>0 (0,0)<br/>N=95</b>                                                                    | <b>&lt;0.001</b> |
| <b>MFC NFT Score</b>                | <b>1 (0,2)<br/>N=101</b>                                         | <b>0 (0,0)<br/>N=103</b>                                                                   | <b>&lt;0.001</b> |
| <b>ANG NFT Score</b>                | <b>1 (1,2)<br/>N=103</b>                                         | <b>0 (0,0)<br/>N=104</b>                                                                   | <b>&lt;0.001</b> |
| <b>SMT NFT Score</b>                | <b>2 (1,3)<br/>N=106</b>                                         | <b>0 (0,0)<br/>N=98</b>                                                                    | <b>&lt;0.001</b> |
| <b>Global Average NFT Score</b>     | <b>1.6 (1.1, 2.2)<br/>N=105</b>                                  | <b>0.3 (0.2, 0.6)<br/>N=97</b>                                                             | <b>&lt;0.001</b> |
| <b>VMTL NP Score</b>                | <b>2 (1.7,2.5)<br/>N=104</b>                                     | <b>0 (0,1.3)<br/>N=103</b>                                                                 | <b>&lt;0.001</b> |
| <b>ACG NP Score</b>                 | <b>2 (1,3)<br/>N=104</b>                                         | <b>0 (0,1)<br/>N=100</b>                                                                   | <b>&lt;0.001</b> |
| <b>MFC NP Score</b>                 | <b>2 (2,3)<br/>N=105</b>                                         | <b>0 (0,1)<br/>N=104</b>                                                                   | <b>&lt;0.001</b> |
| <b>ANG NP Score</b>                 | <b>2 (2,3)<br/>N=104</b>                                         | <b>0 (0,1)<br/>N=103</b>                                                                   | <b>&lt;0.001</b> |
| <b>SMT NP Score</b>                 | <b>3 (2,3)<br/>N=106</b>                                         | <b>0 (0,1.5)<br/>N=101</b>                                                                 | <b>&lt;0.001</b> |
| <b>Global Average NP Score</b>      | <b>2.2 (1.9, 2.7)<br/>N=105</b>                                  | <b>0.1 (0,1.4)<br/>N=101</b>                                                               | <b>&lt;0.001</b> |
| <b>VMTL SYN Score</b>               | <b>2.3 (2.0,2.6)<br/>N=103</b>                                   | <b>2.0 (1.6,2.6)<br/>N=102</b>                                                             | 0.2              |
| <b>ACG SYN Score</b>                | <b>3 (2,3)<br/>N=105</b>                                         | <b>2 (1.3,2)<br/>N=96</b>                                                                  | <b>&lt;0.001</b> |
| <b>MFC SYN Score</b>                | <b>2 (1,2)<br/>N=103</b>                                         | <b>1 (0,2)<br/>N=103</b>                                                                   | <b>&lt;0.001</b> |
| <b>ANG SYN Score</b>                | <b>1 (0,1)<br/>N=99</b>                                          | <b>2 (1,2)<br/>N=98</b>                                                                    | <b>&lt;0.001</b> |
| <b>SMT SYN Score</b>                | <b>2 (1,3)<br/>N=104</b>                                         | <b>1 (0.5,2)<br/>N=101</b>                                                                 | <b>&lt;0.001</b> |
| <b>Global Average SYN Score</b>     | <b>2.0 (1.5,2.5)<br/>N=104</b>                                   | <b>1.4 (1.0,2.0)<br/>N=98</b>                                                              | <b>&lt;0.001</b> |
| <b>NFT Basal Ganglia</b>            | <b>1 (0,1)<br/>N=85</b>                                          | <b>0 (0,0)<br/>N=90</b>                                                                    | <b>&lt;0.001</b> |
| <b>NP Basal Ganglia</b>             | <b>0 (0,2)<br/>N=85</b>                                          | <b>0 (0,0)<br/>N=95</b>                                                                    | <b>&lt;0.001</b> |
| <b>SYN Basal Ganglia</b>            | <b>1 (1,2)<br/>N=88</b>                                          | <b>1 (0,2)<br/>N=88</b>                                                                    | <b>0.007</b>     |
| <b>SYN DN Score</b>                 | <b>2 (1,3)<br/>N=83</b>                                          | <b>2 (1,2)<br/>N=91</b>                                                                    | 0.7              |
| <b>Limbic TDP-43 Frequency</b>      | 19/63 (30.2%)                                                    | 16/87 (18.4%)                                                                              | 0.09             |
| <b>AGD Frequency</b>                | 2/95 (2.1%)                                                      | 1/97 (1.0%)                                                                                | 0.5              |
| <b>HpScl Frequency</b>              | 8/105 (7.6%)                                                     | 10/99 (10.1%)                                                                              | 0.5              |
| <b>CVD Frequency</b>                | 17/103 (16.5%)                                                   | 18/101 (17.8%)                                                                             | 0.8              |

| CAA Score                       | 1 (0,2)<br>N=83                                                    | 0 (0,0)<br>N=93                                                                                                                        | <0.001               |
|---------------------------------|--------------------------------------------------------------------|----------------------------------------------------------------------------------------------------------------------------------------|----------------------|
| <i>APOE</i> 4 Frequency         | 0= 44/103 (42.7%)<br>1= 49/103 (47.5%)<br>2= 10/103 (9.7%)         | 0= 60/105 (57.1%)<br>1= 41/105 (39.1%)<br>2= 4/105 (3.8%)                                                                              | Add=0.05<br>Dom=0.04 |
| <i>MAPT</i> H1 Haplotype        | H2/H2=3/101 (3.0%)<br>H1/H2=33/101 (32.7%)<br>H1/H1=65/101 (64.3%) | H2/H2=2/101 (2.0%)<br>H1/H2=28/101 (27.7%)<br>H1/H1=71/101 (70.3%)                                                                     | Dom=0.6<br>Rec=0.4   |
| <i>SNCA</i> rs356219 Genotype   | GG=25/101 (24.8%)<br>GA=62/101 (61.4%)<br>AA=14/101 (13.9%)        | GG=28/101 (27.7%)<br>GA=57/101 (56.4%)<br>AA=16/101 (15.8%)                                                                            | Add=0.7<br>Rec=0.9   |
| <i>GBA</i> E326K Genotype       | GG=73/73 (100%)<br>GA=0 (0%)<br>AA=0                               | GG=59/67 (88.1%)<br>GA=8/67 (11.9%)<br>AA=0                                                                                            | Add=NA<br>Dom=0.002  |
| <i>GBA</i> Mutation             | <u>Positive= 3/79 (3.8%)</u><br>N370S=2<br>Rec1=1                  | <u>Positive=14/78 (17.9%)</u><br>N370S=6<br>N370S, R463C=1<br>Rec1=1<br>A456P=1<br>L444P=1<br>R163X=1<br>R359X=1<br>S196P=1<br>V394L=1 | 0.004                |
| Age at Onset (years)            | 70.7 (8.1)<br>N=106                                                | 63.3 (11.2)<br>N=105                                                                                                                   | <0.001               |
| Age at Dementia (years)         | 76.0 (69.0, 80.0)<br>N=104                                         | 73.0 (64.0, 78.0)<br>N=102                                                                                                             | 0.06                 |
| Motor-Dementia Interval (years) | 1.88 (6.4)<br>N=88                                                 | 7.9 (7.9)<br>N=98                                                                                                                      | <0.001               |
| Age at Death (years)            | 81.0 (74.3, 85.0)<br>N=108                                         | 77.0 (72.0, 81.0)<br>N=105                                                                                                             | 0.002                |
| Dementia Death Interval (years) | 5.0 (3.7)<br>N=104                                                 | 5.0 (2.7)<br>N=101                                                                                                                     | 0.3                  |
| Disease Duration (years)        | 8.9 (5.4)<br>N=106                                                 | 13.1 (7.0)<br>N=105                                                                                                                    | <0.001               |

**Supplemental Table 2. MDI and disease duration for LBSD Neuropathological Groups based on Braak and CERAD stages.**

Chart displays MDI and Disease Duration for LBSD patients (PDD/DLB) with increasing A) CERAD and B) Braak Pathology. Bold text denotes significant results.

| <b>A</b>                               | <b>LBSD with CERAD C (C3)<br/>N=87</b>    | <b>LBSD with CERAD B (C2)<br/>N=49</b>      | <b>LBSD with CERAD A (C1)<br/>N=15</b> | <b>LBSD with CERAD 0 (C0)<br/>N=60</b> | <b>P-Value ANOVA</b> |
|----------------------------------------|-------------------------------------------|---------------------------------------------|----------------------------------------|----------------------------------------|----------------------|
| <b>Motor-Dementia Interval (years)</b> | 2.2 (6.5) ††, **<br>N=76                  | 4.0 (5.9) ††                                | 8.4 (8.9)<br>N=14                      | 8.5 (8.7)<br>N=59                      | <b>&lt;0.001</b>     |
| <b>Disease Duration (years)</b>        | 9.3 (5.8) ††<br>N=87                      | 9.3 (5.2) ††                                | 11.8 (7.5)<br>N=15                     | 14.5 (7.3)<br>N=60                     | <b>&lt;0.001</b>     |
| <b>B</b>                               | <b>LBSD with Braak V-VI (B3)<br/>N=64</b> | <b>LBSD with Braak III-IV (B2)<br/>N=58</b> | <b>LBSD with Braak I-II (B1) N=81</b>  | <b>LBSD with Braak 0 (B0)<br/>N=8</b>  | <b>P-Value ANOVA</b> |
| <b>Motor-Dementia Interval (years)</b> | 1.3 (6.2) ††, **, #<br>N=51               | 4.1 (8.4) †† *<br>N=52                      | 7.7 (7.2)<br>N=75                      | 10.6 (8.6)<br>N=8                      | <b>&lt;0.001</b>     |
| <b>Disease Duration (years)</b>        | 8.1 (5.1) ††, **, ##<br>N=64              | 10.5 (6.8) †*<br>N=58                       | 13.0 (6.7)<br>N=81                     | 16.8 (4.8)<br>N=8                      | <b>&lt;0.001</b>     |

†† p≤0.01, † p<0.05 compared to C0/B0

\*\* p<0.01, \*p<0.04 compared to C1/B1

## p<0.03, # p≤0.05 compared to B2



**Supplementary Table 3. Neuropathological Group Data PDD/DLB clinical groups.** Chart depicts neuropathological, genetic and clinical data of group-wise comparisons of PDD and DLB clinical subgroups.

|                                     | <b>DLB<br/>N=98</b>                                                                                                                                 | <b>PDD<br/>N=115</b>                                                                                                                                     | <b>P Value</b>   |
|-------------------------------------|-----------------------------------------------------------------------------------------------------------------------------------------------------|----------------------------------------------------------------------------------------------------------------------------------------------------------|------------------|
| Proportion Male                     | 64/98                                                                                                                                               | 88/115                                                                                                                                                   | 0.07             |
| <b>Brain weight (g)</b>             | 1279.6 (156.0)<br>N=85                                                                                                                              | 1309.4 (152.7)<br>N=94                                                                                                                                   |                  |
| <b>Post-mortem Interval (hours)</b> | 8 (4,14)<br>N=72                                                                                                                                    | 11 (6,17)<br>N=109                                                                                                                                       |                  |
| <b>Braak/CERAD</b>                  | <b>B0/C0=1<br/>B1/C0=9<br/>B1/C1=0<br/>B1/C2=5<br/>B1/C3=6<br/>B2/C0=5<br/>B2/C1=3<br/>B2/C2=6<br/>B2/C3=15<br/>B3C1=2<br/>B3C2=14<br/>B3/C3=32</b> | <b>B0/C0=7<br/>B1/C0=32<br/>B1/C1=7<br/>B1/C2=11<br/>B1/C3=11<br/>B2/C0=6<br/>B2/C1=2<br/>B2/C2=11<br/>B2/C3=10<br/>B3/C1=1<br/>B3/C2=2<br/>B3/C3=15</b> | <b>&lt;0.001</b> |
| <b>Lewy body Stage</b>              | <b>Brainstem=2<br/>Limbic=9<br/>Neocortical=87</b>                                                                                                  | <b>Brainstem=2<br/>Limbic=25<br/>Neocortical=88</b>                                                                                                      | <b>0.05</b>      |
| <b>VMTL NFT Score</b>               | <b>2.7 (1.7,3)<br/>N=94</b>                                                                                                                         | <b>2 (1.2,3)<br/>N=114</b>                                                                                                                               | <b>&lt;0.001</b> |
| <b>ACG NFT Score</b>                | <b>1 (0,2)<br/>N=94</b>                                                                                                                             | <b>0 (0,1)<br/>N=104</b>                                                                                                                                 | <b>&lt;0.001</b> |
| <b>MFC NFT Score</b>                | <b>1 (0,2)<br/>N=93</b>                                                                                                                             | <b>0 (0,0)<br/>N=111</b>                                                                                                                                 | <b>&lt;0.001</b> |
| <b>ANG NFT Score</b>                | <b>1 (0,2)<br/>N=94</b>                                                                                                                             | <b>0 (0,0.5)<br/>N=113</b>                                                                                                                               | <b>&lt;0.001</b> |
| <b>SMT NFT Score</b>                | <b>2 (1,3)<br/>N=94</b>                                                                                                                             | <b>0 (0,1)<br/>N=110</b>                                                                                                                                 | <b>&lt;0.001</b> |
| <b>Global Average NFT Score</b>     | <b>1.4 (0.7, 2.2)<br/>N=95</b>                                                                                                                      | <b>0.5 (0.3, 1)<br/>N=107</b>                                                                                                                            | <b>&lt;0.001</b> |
| <b>VMTL NP Score</b>                | <b>2 (1.2,3)<br/>N=95</b>                                                                                                                           | <b>2 (1.2,3)<br/>N=112</b>                                                                                                                               | <b>&lt;0.001</b> |
| <b>ACG NP Score</b>                 | <b>2 (0,2)<br/>N=94</b>                                                                                                                             | <b>1 (0,2)<br/>N=110</b>                                                                                                                                 | <b>0.3</b>       |
| <b>MFC NP Score</b>                 | <b>2 (1,3)<br/>N=96</b>                                                                                                                             | <b>1 (0,2)<br/>N=113</b>                                                                                                                                 | <b>&lt;0.001</b> |
| <b>ANG NP Score</b>                 | <b>2 (1,3)<br/>N=94</b>                                                                                                                             | <b>1 (0,2)<br/>N=113</b>                                                                                                                                 | <b>&lt;0.001</b> |
| <b>SMT NP Score</b>                 | <b>2 (2,3)<br/>N=95</b>                                                                                                                             | <b>1 (0,3)<br/>N=112</b>                                                                                                                                 | <b>&lt;0.001</b> |
| <b>Global Average NP Score</b>      | <b>2 (1.3, 2.7)<br/>N=96</b>                                                                                                                        | <b>1.1 (0.2,2)<br/>N=110</b>                                                                                                                             | <b>&lt;0.001</b> |
| <b>VMTL SYN Score</b>               | <b>2.3 (2.0,2.7)<br/>N=92</b>                                                                                                                       | <b>2.0 (1.7,2.4)<br/>N=113</b>                                                                                                                           | <b>0.02</b>      |
| <b>ACG SYN Score</b>                | <b>3 (2,3)<br/>N=94</b>                                                                                                                             | <b>2 (2,2)<br/>N=107</b>                                                                                                                                 | <b>0.2</b>       |
| <b>MFC SYN Score</b>                | <b>1 (1,2)<br/>N=92</b>                                                                                                                             | <b>1 (1,2)<br/>N=114</b>                                                                                                                                 | <b>0.1</b>       |
| <b>ANG SYN Score</b>                | <b>1.5 (1,2)<br/>N=90</b>                                                                                                                           | <b>1 (0,2)<br/>N=107</b>                                                                                                                                 | <b>&lt;0.001</b> |
| <b>SMT SYN Score</b>                | <b>2 (1,3)<br/>N=93</b>                                                                                                                             | <b>1 (1,2)<br/>N=113</b>                                                                                                                                 | <b>&lt;0.001</b> |
| <b>Global Average SYN Score</b>     | <b>1.9 (1.5,2.5)<br/>N=93</b>                                                                                                                       | <b>1.4 (1.0,2.0)<br/>N=98</b>                                                                                                                            | <b>&lt;0.001</b> |
| <b>NFT Basal Ganglia</b>            | <b>1 (0,1)<br/>N=72</b>                                                                                                                             | <b>0 (0,1)<br/>N=103</b>                                                                                                                                 | <b>0.028</b>     |
| <b>NP Basal Ganglia</b>             | <b>0 (0,1)<br/>N=72</b>                                                                                                                             | <b>0 (0,0.7)<br/>N=108</b>                                                                                                                               | <b>0.09</b>      |
| <b>SYN Basal Ganglia</b>            | <b>1 (1,2)<br/>N=73</b>                                                                                                                             | <b>1 (0,2)<br/>N=103</b>                                                                                                                                 | <b>0.026</b>     |
| <b>SYN DN Score</b>                 | <b>2 (1,3)<br/>N=66</b>                                                                                                                             | <b>1 (1,2)<br/>N=108</b>                                                                                                                                 | <b>0.001</b>     |
| Limbic TDP-43 Frequency             | 15/51                                                                                                                                               | 20/99                                                                                                                                                    | 0.2              |
| AGD Frequency                       | 1/88                                                                                                                                                | 2/104                                                                                                                                                    | 0.6              |
| HpScI Frequency                     | 8/93                                                                                                                                                | 10/111                                                                                                                                                   | 0.4              |
| CVD Frequency                       | 14/94                                                                                                                                               | 21/110                                                                                                                                                   | 0.4              |

|                                        |                                                       |                                                         |                  |
|----------------------------------------|-------------------------------------------------------|---------------------------------------------------------|------------------|
| <b>CAA Score</b>                       | <b>1 (0,1)</b><br>N=67                                | <b>0 (0,1)</b><br>N=109                                 | <b>&lt;0.001</b> |
| <b>APOE 4 Frequency</b>                | <b>0= 42/95</b><br><b>1= 41/95</b><br><b>2= 12/95</b> | <b>0= 62/113</b><br><b>1= 49/113</b><br><b>2= 2/113</b> | <b>0.006</b>     |
| <b>MAPT H1 Haplotype</b>               | H2/H2=2/92<br>H1/H2=30/92<br>H1/H1=60/92              | H2/H2=3/110<br>H1/H2=31/110<br>H1/H1=76/110             | 0.8              |
| <b>SNCA rs356219 Genotype</b>          | GG=30/92<br>GA=67/92<br>AA=20/92                      | GG=23/110<br>GA=67/110<br>AA=20/110                     | 0.1              |
| <b>GBA E326K Genotype</b>              | GG=65/68<br>GA=3/68<br>AA=0                           | GG=67/72<br>GA=5/72<br>AA=0                             | 0.5              |
| <b>GBA Mutation</b>                    | 7/65 positive                                         | 10/92 positive                                          | 0.9              |
| <b>Age at Onset (years)</b>            | <b>71.9 (9.0)</b><br>N=96                             | <b>63.0 (9.8)</b><br>N=115                              | <b>&lt;0.001</b> |
| Age at Dementia (years)                | 71.0 (66.5, 79.5)<br>N=97                             | 74.0 (69.5, 80.0)<br>N=109                              | 0.4              |
| <b>Motor-Dementia Interval (years)</b> | <b>-2.2 (2.6)</b><br>N=77                             | <b>10.1 (6.1)</b><br>N=109                              | <b>&lt;0.001</b> |
| Age at Death (years)                   | 80 (72, 85.0)<br>N=98                                 | 79.0 (74.0, 82.0)<br>N=115                              | 0.4              |
| <b>Dementia Death Interval (years)</b> | <b>6.0 (4,8)</b><br>N=96                              | <b>3.0 (2,6)</b><br>N=115                               | <b>&lt;0.001</b> |
| <b>Disease Duration (years)</b>        | <b>6.6 (2.7)</b><br>N=96                              | <b>14.6 (6.7)</b><br>N=115                              | <b>&lt;0.001</b> |

**Supplemental Table 4• Characteristics of Clinical DLB cases with Pure SYN Pathology.** Chart depicts data from subset of rare cases with DLB clinical phenotype and pure SYN neuropathology. Shaded/bolded cells indicate presence of pathological/genetic co-morbidities

| Case | Age at Onset | Age at Death | MDI | Disease Duration | Gender | Braak Stage | CERAD stage | LBD Stage | APOE Genotype | GBA Mutation Status | GBA E326K Genotype | CVD        | AGD | HpScl | TDP |
|------|--------------|--------------|-----|------------------|--------|-------------|-------------|-----------|---------------|---------------------|--------------------|------------|-----|-------|-----|
| 1    | 50           | 57           | -3  | 7                | M      | 0           | 0           | NC        | 3/3           | <b>R163X</b>        | GG                 | No         | No  | No    | No  |
| 2    | 63           | 73           | -3  | 10               | M      | 1           | 0           | NC        | 3/3           | Negative            | GG                 | No         | No  | No    | No  |
| 3    | 52           | 61           | 1   | 9                | M      | 1           | 0           | NC        | <b>4/4</b>    | <b>Rec1</b>         | GG                 | No         | No  | No    | No  |
| 4    | 49           | 60           | -6  | 11               | M      | 1           | 0           | NC        | 3/4           | Negative            | <b>GA</b>          | No         | No  | No    | No  |
| 5    | 62           | 68           | -4  | 6                | M      | 1           | 0           | NC        | 3/3           | <b>N370S</b>        | GG                 | No         | No  | No    | No  |
| 6    | 68           | 76           | 0   | 8                | M      | 1           | 0           | BP        | 3/3           | NA                  | NA                 | <b>YES</b> | No  | No    | No  |
| 7    | 68           | 76           | -8  | 8                | M      | 1           | 0           | NC        | 3/3           | Negative            | <b>GA</b>          | No         | No  | No    | No  |
| 8    | 76           | 83           | 0   | 7                | M      | 1           | 0           | NC        | <b>3/4</b>    | NA                  | NA                 | No         | NA  | No    | NA  |
| 9    | 77           | 80           | 0   | 3                | M      | 1           | 0           | NC        | <b>3/4</b>    | Negative            | GG                 | No         | No  | No    | NA  |
| 10   | 68           | 75           | 0   | 7                | M      | 1           | 0           | NC        | <b>3/4</b>    | Negative            | GG                 | No         | NA  | No    | NA  |

NC= neocortical LBD stage, BP= brainstem predominant stage, NA=not available.

**Supplemental Table 5. Linear regression models to predict the motor-dementia interval in Lewy body spectrum disorders.** Chart displays univariate associations between neuropathological and genetic variables with the timing of dementia (MDI) in LBSD (PDD/DLB) in the upper panel. The lower panel displays the variables surviving the final multivariate model with beta estimates generated from bootstrapping sampling procedure with 1,000 bootstrap samples. Based on 158 observations.

| Univariate Models                   |                          |                 |              |                |
|-------------------------------------|--------------------------|-----------------|--------------|----------------|
| Variable                            | Beta (95% CI)            | t-value (df)    | p-value      | R <sup>2</sup> |
| Cerebral Tau score (cont.)          | -4.1 (-5.4, -2.9)        | -6.6 (1)        | <0.0001      | 0.20           |
| Cerebral NP score (cont.)           | -2.5 (-3.5, -1.6)        | -5.1 (1)        | <0.0001      | 0.12           |
| Cerebral SYN score (cont.)          | -3.1 (-4.7, -1.6)        | -4.0 (1)        | <0.0001      | 0.08           |
| CVD (categorical)                   | <b>1.9 (-1.2, 5.0)</b>   | <b>1.2 (1)</b>  | <b>0.217</b> | <b>0.003</b>   |
| APOE 4 (≥ 1 allele)                 | -2.4 (-4.6, -0.1)        | -2.0 (1)        | 0.044        | 0.02           |
| SNCA rs356219 (≥ 1 risk allele "A") | <b>1.1 (-1.6, 3.9)</b>   | <b>0.8 (1)</b>  | <b>0.421</b> | <b>0.004</b>   |
| MAPT (H1/H1 haplotype)              | <b>-0.3 (-2.9, 2.2)</b>  | <b>-0.3 (1)</b> | <b>0.792</b> | <b>0.0004</b>  |
| Age at Death                        | <b>0.04 (-0.1, 0.2)</b>  | <b>0.6 (1)</b>  | <b>0.535</b> | <b>0.002</b>   |
| Gender                              | <b>0.5 (-2.1, 3.2)</b>   | <b>0.4 (1)</b>  | <b>0.702</b> | <b>0.0008</b>  |
| Final Multivariate Model            |                          |                 |              |                |
| Variable                            | Beta (95% CI)            | t-value (df)    | p-value      | R <sup>2</sup> |
| Cerebral Tau score (cont.)          | -4.0 (-5.5, -2.6)        | -4.6 (8)        | <0.0001      |                |
| Cerebral NP score (cont.)           | <b>-0.6 (-2.0, 0.8)</b>  | <b>-0.9 (8)</b> | <b>0.400</b> |                |
| Cerebral SYN score (cont.)          | <b>-0.2 (-2.1, 1.4)</b>  | <b>-0.2 (8)</b> | <b>0.830</b> |                |
| CVD (categorical)                   | <b>1.7 (-1.4, 4.7)</b>   | <b>1.1 (8)</b>  | <b>0.290</b> |                |
| APOE 4 (≥ 1 allele)                 | <b>-0.3 (-2.5, 2.0)</b>  | <b>-0.3 (8)</b> | <b>0.807</b> |                |
| MAPT (H1/H1 haplotype)              | <b>0.3 (-2.2, 3.0)</b>   | <b>0.3 (8)</b>  | <b>0.829</b> |                |
| Age at Death                        | 0.2 (0.002, 0.3)         | 2.0 (8)         | 0.05         |                |
| Gender                              | <b>0.9 (-1.7, 3.3)</b>   | <b>0.6 (8)</b>  | <b>0.508</b> |                |
| Intercept                           | <b>-3.5 (-18.3, 9.4)</b> | <b>-0.5 (8)</b> | <b>0.608</b> | <b>0.22</b>    |

**Supplemental Table 6. Linear regression models to predict survival in Lewy body spectrum disorders.**

Chart displays univariate associations between neuropathological and genetic variables with overall survival in LBSD (PDD/DLB) in the upper panel. The lower panel displays the variables surviving the final multivariate model with beta estimates generated from bootstrapping sampling procedure with 1,000 bootstrap samples. Based on 175 observations.

| Univariate Models                   |                          |                 |              |                |
|-------------------------------------|--------------------------|-----------------|--------------|----------------|
| Variable                            | Beta (95% CI)            | t-value (df)    | p-value      | R <sup>2</sup> |
| Cerebral Tau score (cont.)          | -2.8 (-3.8, -1.8)        | -5.4 (1)        | <0.0001      | 0.13           |
| Cerebral NP score (cont.)           | -1.9 (-2.8, -1.1)        | -4.7 (1)        | <0.0001      | 0.09           |
| Cerebral SYN score (cont.)          | -2.6 (-3.9, -1.3)        | -4.1 (1)        | <0.0001      | 0.07           |
| CVD (categorical)                   | <b>2.0 (-0.5, 4.4)</b>   | <b>1.6 (1)</b>  | <b>0.114</b> | <b>0.01</b>    |
| APOE 4 (≥ 1 allele)                 | -2.7 (-4.5, -0.9)        | -3.0 (1)        | 0.003        | 0.04           |
| SNCA rs356219 (≥ 1 risk allele "A") | <b>0.6 (-1.6, 2.7)</b>   | <b>0.5 (1)</b>  | <b>0.604</b> | <b>0.001</b>   |
| MAPT (H1/H1 haplotype)              | <b>-0.1 (-2.1, 1.9)</b>  | <b>-0.1 (1)</b> | <b>0.912</b> | <b>0.0001</b>  |
| Age at Death                        | <b>-0.02 (-0.1, 0.1)</b> | <b>-0.3 (1)</b> | <b>0.731</b> | <b>0.0006</b>  |
| Gender                              | <b>0.2 (-1.8, 2.2)</b>   | <b>0.2 (1)</b>  | <b>0.877</b> | <b>0.0001</b>  |
| Final Multivariate Model            |                          |                 |              |                |
| Variable                            | Beta (95% CI)            | t-value (df)    | p-value      | R <sup>2</sup> |
| Cerebral Tau score (cont.)          | -2.0 (-3.1, -0.8)        | -2.7 (8)        | 0.003        |                |
| Cerebral NP score (cont.)           | <b>-1.0 (-2.2, 0.3)</b>  | <b>-1.7 (8)</b> | <b>0.134</b> |                |
| Cerebral SYN score (cont.)          | <b>-0.4 (-2.2, 1.1)</b>  | <b>-0.5 (8)</b> | <b>0.614</b> |                |
| CVD (categorical)                   | <b>1.8 (-1.5, 4.6)</b>   | <b>1.3 (8)</b>  | <b>0.268</b> |                |
| APOE 4 (≥ 1 allele)                 | <b>-1.7 (-3.6, 0.1)</b>  | <b>-1.8 (8)</b> | <b>0.075</b> |                |
| MAPT (H1/H1 haplotype)              | <b>0.5 (-1.5, 2.6)</b>   | <b>0.5 (8)</b>  | <b>0.634</b> |                |
| Age at Death                        | <b>0.01 (-0.1, 0.1)</b>  | <b>0.2 (8)</b>  | <b>0.865</b> |                |
| Gender                              | <b>1.1 (-1.1, 3.5)</b>   | <b>1.0 (8)</b>  | <b>0.351</b> |                |
| Intercept                           | <b>13.3 (2.9, 24.4)</b>  | <b>2.5 (8)</b>  | <b>0.023</b> | 0.15           |
